# Supplementary material for: Polyoxoanions assembled by the condensation of vanadate, tungstate and selenite: solution studies and crystal structures of the mixed metal derivatives (NMe4)2Na2[WVI4VV2O19]·8H2O and (NMe4)4.83[(SeIV WVI4.57VV4.43O33)2(WVI(O)(H2O))(VVO)2.6]·10.57H2O
Source: Royal Society of Chemistry journal article supplement (doi:10.1039/c5nj00858a), 2015-06-10
Supplement: c5nj00858a1.pdf [file c5nj00858a1.pdf]

## Polyoxoanions assembled by condensation of Vanadate, Tungstate and Selenite: Solution Studies and Crystal Structures of Mixed Metal Derivatives

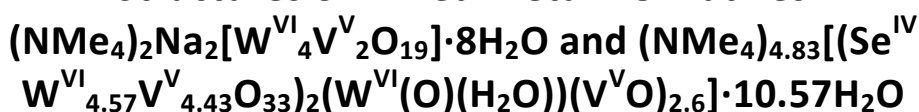

P.A. Abramov\*,<sup>a,b</sup> E.V. Peresykina,<sup>a</sup> N.V. Izarova,<sup>c</sup> C.Vicent,<sup>d</sup> A. Zhdanov,<sup>a</sup> N.B. Kompankov,<sup>a</sup> T. Gutsul,<sup>e</sup> M.N. Sokolov<sup>a,b</sup>

### Supporting information

#### 1) Crystal structures

**Table S1.** Crystallographic data for **1** and **2**.

**Fig. S1.** The numeration scheme in the structure of heterometallic  $[(\text{W}_4\text{V}_2)\text{O}_{19}]^{4-}$  Lindqvist anion in  $(\text{NMe}_4)_2\text{Na}_2[(\text{W}_4\text{V}_2)\text{O}_{19}]\cdot 8\text{H}_2\text{O}$ .

**Table S2.** Selected geometric parameters ( $\text{\AA}$ ,  $^\circ$ ) in **1**.

**Fig. S2.** The layer (top) and interposition of layers (bottom) in  $(\text{NMe}_4)_2\text{Na}_2[(\text{W}_4\text{V}_2)\text{O}_{19}]\cdot 8\text{H}_2\text{O}$ .

**Fig. S3.** The numeration scheme in the structure of heterometallic  $[(\text{Se}(\text{W}_{4.57}/\text{V}_{4.43})\text{O}_{33})_2(\text{W}(\text{O})(\text{H}_2\text{O}))(\text{VO})_{2.6}]^{4.83-}$  in **2** (partial polyhedral view).

**Table S3.** Selected geometric parameters ( $\text{\AA}$ ,  $^\circ$ ) in **2**.

**Fig. S4.** The anion  $[(\text{Se}(\text{W}_{4.57}/\text{V}_{4.43})\text{O}_{33})_2(\text{W}(\text{O})(\text{H}_2\text{O}))(\text{VO})_{2.6}]^{4.83-}$  (right) and crystal packing in  $(\text{NMe}_4)_{4.83}[(\text{Se}(\text{W}_{4.57}/\text{V}_{4.43})\text{O}_{33})_2(\text{W}(\text{O})(\text{H}_2\text{O}))(\text{VO})_{2.6}]\cdot 10.57\text{H}_2\text{O}$  (left) (**2**, polyhedral view).

#### 2) ESI-MS

**Fig. S5.** ESI mass spectrum of  $10^{-4}$  M water solutions of sample **2** with 0.1 % of formic acid

**Fig. S6.** Expanded regions of the ESI mass spectrum of  $10^{-4}$  M water solutions of sample **2** with 0.1 % of formic acid in the  $m/z$  1150 to 1500 range where triply-charged anions are seen. Additional peaks featuring the central  $\{\text{WO}(\text{VO})_2\}$  belt were also observed for example at  $m/z$  1338  $\{[(\text{Se}_2\text{W}_{11}\text{V}_7\text{O}_{66})\{\text{WO}(\text{VO})_2\} + 13\text{H} + 2\text{K}]^{3-}$  or 1293  $\{[(\text{Se}_2\text{W}_{10}\text{V}_8\text{O}_{66})\{\text{WO}(\text{VO})_2\} + 12\text{H} + 2\text{K}]^{3-}$  but were overlapped with the dominant peaks due to POMs with the central  $\{\text{WO}(\text{VO})_3\}$  belt.

**Fig. S7.** Expanded region of the ESI mass spectrum of  $10^{-4}$  M water solutions of sample **2** with 0.1 % of formic acid in the  $m/z$  1850 to 2150 range (top) and simulated and experimental isotopic pattern for the indicated  $\text{H}^+$  adducts.

**Fig. S8.** Expanded region of the ESI mass spectrum of  $10^{-4}$  M water solutions of sample **2** with 0.1 % of formic acid in m/z 1150 to 1500 range (top) and simulated and experimental isotopic pattern for the indicated H<sup>+</sup> adducts.

**Fig. S9.**  $^{51}\text{V}$  NMR spectra of initial mixture.

**Fig. S10.**  $^{51}\text{V}$  NMR spectra of enriched product.

**Fig. S11.**  $^{77}\text{Se}$  NMR spectra of enriched product.

## Crystal structures.

**Table S1.** Crystallographic data for **1** and **2**.

| Compound                                                                                                       | <b>1</b>                                                                                                    | <b>2</b>                                                                                                                         |
|----------------------------------------------------------------------------------------------------------------|-------------------------------------------------------------------------------------------------------------|----------------------------------------------------------------------------------------------------------------------------------|
| Crystal data                                                                                                   |                                                                                                             |                                                                                                                                  |
| Chemical formula                                                                                               | C <sub>8</sub> H <sub>40</sub> N <sub>2</sub> Na <sub>2</sub> O <sub>27</sub> V <sub>2</sub> W <sub>4</sub> | C <sub>19.32</sub> H <sub>81.10</sub> N <sub>4.83</sub> O <sub>81.17</sub> Se <sub>2</sub> V <sub>11.46</sub> W <sub>10.14</sub> |
| <i>M<sub>r</sub></i>                                                                                           | 1479.68                                                                                                     | 4286.10                                                                                                                          |
| Crystal system, space group                                                                                    | Orthorhombic, <i>Pnma</i>                                                                                   | Orthorhombic, <i>Pnn2</i>                                                                                                        |
| Temperature (K)                                                                                                | 150                                                                                                         | 150                                                                                                                              |
| <i>a</i> , <i>b</i> , <i>c</i> (Å)                                                                             | 18.6008(10),<br>18.2252(9)                                                                                  | 9.9127(5),<br>19.4257(11),<br>21.2136(11),<br>12.9194(6)                                                                         |
| <i>V</i> (Å <sup>3</sup> )                                                                                     | 3360.4(3)                                                                                                   | 5323.9(5)                                                                                                                        |
| <i>Z</i>                                                                                                       | 4                                                                                                           | 2                                                                                                                                |
| Radiation type                                                                                                 | Mo Kα                                                                                                       | Cu Kα                                                                                                                            |
| μ (mm <sup>-1</sup> )                                                                                          | 14.29                                                                                                       | 29.32                                                                                                                            |
| Crystal size (mm)                                                                                              | 0.266 × 0.185 × 0.138                                                                                       | 0.10 × 0.10 × 0.05                                                                                                               |
| Data collection                                                                                                |                                                                                                             |                                                                                                                                  |
| Diffractometer                                                                                                 | Bruker DUO CCD detector diffractometer                                                                      | Bruker DUO CCD detector diffractometer                                                                                           |
| Absorption correction                                                                                          | Empirical (using intensity measurements) based on intensities ( <i>SADABS</i> , Bruker, 2005)               | Empirical (using intensity measurements) based on intensities ( <i>SADABS</i> , Bruker, 2005)                                    |
| <i>T<sub>min</sub></i> , <i>T<sub>max</sub></i>                                                                | 0.0532, 0.0998                                                                                              | 0.144, 0.320                                                                                                                     |
| No. of measured, independent and observed [ <i>I</i> > 2σ( <i>I</i> )] reflections                             | 23362, 4082, 3682                                                                                           | 39238, 8396, 6877                                                                                                                |
| <i>R<sub>int</sub></i>                                                                                         | 0.0455                                                                                                      | 0.067                                                                                                                            |
| Refinement                                                                                                     |                                                                                                             |                                                                                                                                  |
| <i>R</i> [ <i>F</i> <sup>2</sup> > 2σ( <i>F</i> <sup>2</sup> )], <i>wR</i> ( <i>F</i> <sup>2</sup> ), <i>S</i> | 0.0513, 0.1095, 1.188                                                                                       | 0.050, 0.146, 1.06                                                                                                               |
| No. of reflections                                                                                             | 4082                                                                                                        | 8396                                                                                                                             |
| No. of parameters                                                                                              | 259                                                                                                         | 642                                                                                                                              |
| No. of restraints                                                                                              | 0                                                                                                           | 1                                                                                                                                |
| Δ <sub>max</sub> , Δ <sub>min</sub> (e Å <sup>-3</sup> )                                                       | 2.870, -2.557                                                                                               | 1.17, -2.59                                                                                                                      |

Computer programs: Apex2 V.1.27 (Bruker, 2005), *SHELXS97* (Sheldrick, 1990), *SHELXL97* (Sheldrick, 1997), *SHELXTL* V6.22 (Bruker, 2000-2005), *SHELXL2013* (Sheldrick, 2013).

**1) (NMe<sub>4</sub>)<sub>2</sub>Na<sub>2</sub>[(W<sub>4</sub>V<sub>2</sub>)O<sub>19</sub>]·8H<sub>2</sub>O (1)**

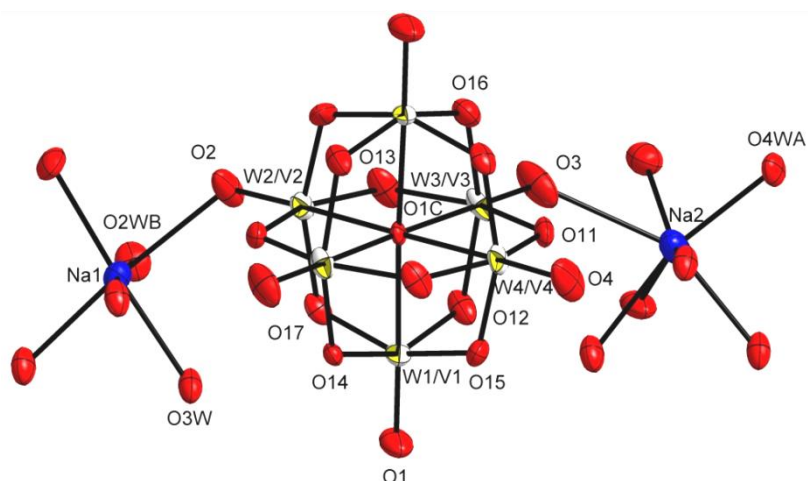

**Fig. S1.** The numeration scheme in the structure of heterometallic [(W<sub>4</sub>V<sub>2</sub>)O<sub>19</sub>]<sup>4-</sup> Lindqvist anion in (NMe<sub>4</sub>)<sub>2</sub>Na<sub>2</sub>[(W<sub>4</sub>V<sub>2</sub>)O<sub>19</sub>]·8H<sub>2</sub>O.

**Table S2.** Selected geometric parameters (Å, °) in **1**.

|                     |            |                         |            |
|---------------------|------------|-------------------------|------------|
| W1—O1               | 1.698 (8)  | O4WA—Na2                | 2.29 (2)   |
| W2—O2               | 1.710 (11) | O4WB—Na2                | 2.49 (4)   |
| W3—O3               | 1.667 (8)  | O5W—Na2                 | 2.507 (18) |
| W4—O4               | 1.645 (12) | O2WA—Na1                | 2.33 (2)   |
| W1—O12              | 1.913 (7)  | O2WB—Na1                | 2.392 (17) |
| W1—O14              | 1.908 (5)  | O3W—Na1                 | 2.390 (9)  |
| W1—O15              | 1.896 (7)  | O3W—Na2 <sup>ii</sup>   | 2.427 (9)  |
| W1—O17              | 1.935 (7)  | O2—Na1                  | 2.571 (13) |
| W2—O13              | 1.912 (8)  | Na1—O2WA <sup>i</sup>   | 2.33 (2)   |
| W2—O13 <sup>i</sup> | 1.912 (8)  | Na1—O2WB <sup>i</sup>   | 2.392 (17) |
| W2—O17 <sup>i</sup> | 1.919 (7)  | Na1—O3W <sup>i</sup>    | 2.390 (9)  |
| W2—O17              | 1.919 (7)  | O1W—Na2 <sup>ii</sup>   | 2.496 (13) |
| W3—O11              | 1.901 (7)  | Na2—O1W <sup>iv</sup>   | 2.496 (13) |
| W3—O12              | 1.916 (8)  | Na2—O3W <sup>iv</sup>   | 2.427 (9)  |
| W3—O13              | 1.922 (8)  | Na2—O3W <sup>v</sup>    | 2.427 (9)  |
| W3—O16              | 1.905 (5)  | Na2—O4WB <sup>iii</sup> | 2.49 (4)   |
| W4—O11              | 1.881 (7)  | Na2—O5W <sup>iii</sup>  | 2.507 (18) |
| W4—O11 <sup>i</sup> | 1.881 (7)  | O1W—Na1                 | 2.367 (13) |
| W4—O15 <sup>i</sup> | 1.913 (8)  | N1—C11                  | 1.499 (18) |
| W4—O15              | 1.913 (8)  | N1—C12                  | 1.492 (18) |
| W4—O1C              | 2.308 (8)  | N1—C13                  | 1.480 (12) |

|                                      |                     |                         |                      |
|--------------------------------------|---------------------|-------------------------|----------------------|
| W1—O1C                               | 2.293 (6)           | N1—C13 <sup>iii</sup>   | 1.480 (12)           |
| W2—O1C                               | 2.257 (8)           | N2—C21                  | 1.47 (2)             |
| W3—O1C                               | 2.287 (6)           | N2—C22                  | 1.480 (19)           |
|                                      |                     | N2—C23                  | 1.456 (17)           |
|                                      |                     | N2—C23 <sup>i</sup>     | 1.456 (17)           |
| W1 <sup>i</sup> —O1C—W1              | 89.9 (3)            | W4—O11—W3               | 115.2 (3)            |
| W1 <sup>i</sup> —O1C—W4              | 88.8 (3)            | W1—O12—W3               | 115.7 (4)            |
| W1—O1C—W4                            | 88.8 (3)            | W2—O13—W3               | 115.9 (4)            |
| W2—O1C—W1 <sup>i</sup>               | 91.7 (2)            | W1—O14—W1 <sup>i</sup>  | 116.2 (4)            |
| W2—O1C—W1                            | 91.7 (2)            | W1—O15—W4               | 115.4 (3)            |
| W2—O1C—W3                            | 91.3 (3)            | W3 <sup>i</sup> —O16—W3 | 115.7 (5)            |
| W2—O1C—W3 <sup>i</sup>               | 91.3 (3)            | W2—O17—W1               | 115.9 (3)            |
| W3 <sup>i</sup> —O1C—W1 <sup>i</sup> | 90.13 (2)           | Range                   | 115.2 (3)-116.2 (4)  |
| W3—O1C—W1                            | 90.13 (2)           | W2—O1C—W4               | 179.2 (4)            |
| W3—O1C—W3 <sup>i</sup>               | 89.7 (3)            | W3—O1C—W1 <sup>i</sup>  | 176.9 (4)            |
| W3—O1C—W4                            | 88.1 (2)            | W3 <sup>i</sup> —O1C—W1 | 176.9 (4)            |
| W3 <sup>i</sup> —O1C—W4              | 88.1 (2)            | Range                   | 176.9 (4) -179.2 (4) |
| V3 <sup>i</sup> —O1C—V1 <sup>i</sup> | 90.13 (2)           |                         |                      |
| Range                                | 88.1 (2) - 91.7 (2) |                         |                      |

Symmetry code(s): (i)  $x, -y+1/2, z$ ; (ii)  $-x+1/2, -y, z+1/2$ ; (iii)  $x, -y-1/2, z$ ; (iv)  $-x+1/2, -y, z-1/2$ ; (v)  $-x+1/2, y-1/2, z-1/2$ .

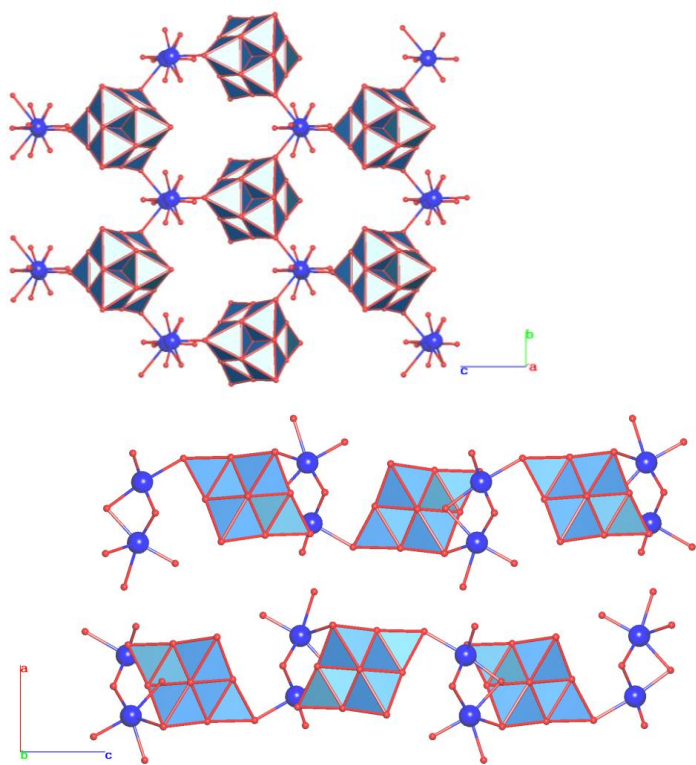

**Fig. S2.** The layer (top) and interposition of layers (bottom) in  $(\text{NMe}_4)_2\text{Na}_2[(\text{W}_4\text{V}_2)\text{O}_{19}] \cdot 8\text{H}_2\text{O}$ .

**2) (NMe<sub>4</sub>)<sub>4.83</sub>[(Se(W<sub>4.57</sub>/V<sub>4.43</sub>)O<sub>33</sub>)<sub>2</sub>(W(O)(H<sub>2</sub>O))(VO)<sub>2.6</sub>]<sub>2</sub>·10.57H<sub>2</sub>O (2)**

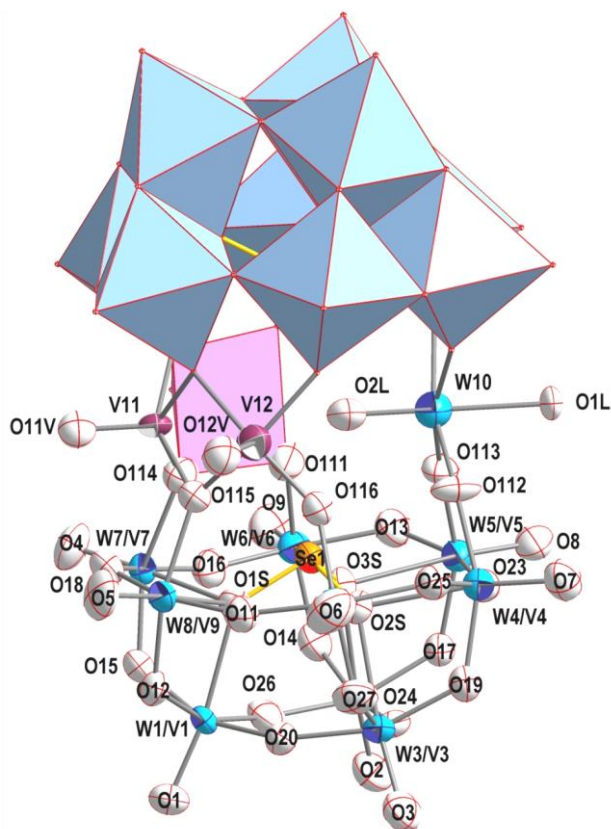

**Fig. S3.** The numeration scheme in the structure of heterometallic [(Se(W<sub>4.57</sub>/V<sub>4.43</sub>)O<sub>33</sub>)<sub>2</sub>(W(O)(H<sub>2</sub>O))(VO)<sub>2.6</sub>]<sup>4.83-</sup> in **2** (partial polyhedral view).

**Table S3.** Selected geometric parameters (Å, °) in **2**.

|        |            |                             |            |
|--------|------------|-----------------------------|------------|
| W1—O1  | 1.676 (18) | W4—O112                     | 1.893 (15) |
| W2—O2  | 1.68 (2)   | W5—O113                     | 1.904 (16) |
| W3—O3  | 1.68 (2)   | W6—O111                     | 1.943 (17) |
| W4—O7  | 1.678 (19) | W7—O114                     | 2.018 (18) |
| W5—O8  | 1.672 (19) | W8—O115                     | 2.021 (17) |
| W6—O9  | 1.63 (2)   | W9—O116                     | 1.894 (15) |
| W7—O4  | 1.63 (2)   | <b>W(O)(H<sub>2</sub>O)</b> |            |
| W8—O5  | 1.632 (19) | W10—O1L                     | 2.28 (2)   |
| W9—O6  | 1.64 (2)   | W10—O2L                     | 1.68 (3)   |
| W1—O1S | 2.320 (16) | W10—O113                    | 1.896 (16) |
| W2—O3S | 2.392 (16) | W10—O113 <sup>i</sup>       | 1.896 (16) |
| W3—O2S | 2.382 (16) | W10—O112                    | 1.898 (15) |
| W4—O2S | 2.392 (16) | W10—O112 <sup>i</sup>       | 1.898 (16) |
| W5—O3S | 2.381 (15) | <b>V-O</b>                  |            |

|             |            |                       |            |
|-------------|------------|-----------------------|------------|
| W6—O3S      | 2.333 (17) | V11—O11V              | 1.52 (4)   |
| W9—O2S      | 2.377 (18) | V11—O115 <sup>i</sup> | 1.920 (18) |
| W7—O1S      | 2.364 (17) | V11—O115              | 1.920 (18) |
| W8—O1S      | 2.379 (17) | V11—O114 <sup>i</sup> | 1.97 (2)   |
| W1—O20      | 1.878 (19) | V11—O114              | 1.97 (2)   |
| W1—O12      | 1.913 (18) | V12—O12V              | 1.58 (2)   |
| W1—O26      | 1.928 (19) | V12—O116              | 1.774 (17) |
| W1—O15      | 1.95 (2)   | V12—O111 <sup>i</sup> | 1.825 (19) |
| W2—O17      | 1.865 (16) | V12—O114 <sup>i</sup> | 1.984 (19) |
| W2—O26      | 1.882 (18) | V12—O115              | 1.989 (19) |
| W2—O14      | 1.91 (2)   | O111—V12 <sup>i</sup> | 1.825 (19) |
| W2—O24      | 1.919 (18) | O114—V12 <sup>i</sup> | 1.984 (19) |
| W3—O19      | 1.881 (17) | <b>Se-O</b>           |            |
| W3—O24      | 1.894 (19) | Se1—O2S               | 1.693 (16) |
| W3—O27      | 1.906 (19) | Se1—O1S               | 1.695 (16) |
| W3—O20      | 1.920 (17) | Se1—O3S               | 1.705 (17) |
| W4—O23      | 1.901 (18) | <b>N-C</b>            |            |
| W4—O19      | 1.927 (17) | N1—C13                | 1.45 (4)   |
| W4—O25      | 1.929 (19) | N1—C11                | 1.48 (4)   |
| W5—O23      | 1.866 (18) | N1—C14                | 1.49 (4)   |
| W5—O17      | 1.898 (17) | N1—C12                | 1.54 (4)   |
| W5—O13      | 1.905 (18) | N2—C24                | 1.42 (6)   |
| W6—O16      | 1.834 (19) | N2—C21                | 1.43 (5)   |
| W6—O14      | 1.878 (19) | N2—C23                | 1.47 (4)   |
| W6—O13      | 1.938 (18) | N2—C22                | 1.50 (7)   |
| W7—O15      | 1.868 (17) | N3—C34                | 1.39 (7)   |
| W7—O16      | 1.87 (2)   | N3—C31                | 1.41 (7)   |
| W7—O18      | 1.93 (2)   | N3—C32                | 1.46 (5)   |
| W8—O11      | 1.82 (2)   | N3—C33                | 1.46 (6)   |
| W8—O12      | 1.893 (17) |                       |            |
| W8—O18      | 1.95 (2)   |                       |            |
| W9—O27      | 1.892 (18) |                       |            |
| W9—O25      | 1.940 (18) |                       |            |
| W9—O11      | 1.877 (18) |                       |            |
|             |            |                       |            |
| O2S—Se1—O1S | 98.8 (8)   | W6—O16—W7             | 156.6 (11) |
| O2S—Se1—O3S | 99.4 (8)   | W2—O17—W5             | 127.3 (9)  |
| O1S—Se1—O3S | 99.3 (8)   | W7—O18—W8             | 122.2 (10) |



|                                          |            |                           |            |
|------------------------------------------|------------|---------------------------|------------|
| W1—O1S—W7                                | 90.6 (6)   | W3—O19—W4                 | 125.4 (9)  |
| W1—O1S—W8                                | 90.5 (5)   | W1—O20—W3                 | 149.3 (12) |
| W7—O1S—W8                                | 91.3 (6)   | W5—O23—W4                 | 153.8 (10) |
| W9—O2S—W3                                | 90.3 (6)   | W3—O24—W2                 | 147.7 (9)  |
| W9—O2S—W4                                | 91.3 (6)   | W4—O25—W9                 | 123.5 (10) |
| W3—O2S—W4                                | 90.3 (5)   | W2—O26—W1                 | 148.8 (11) |
| W6—O3S—W5                                | 92.4 (6)   | W9—O27—W3                 | 125.3 (9)  |
| W6—O3S—W2                                | 89.9 (6)   | V12 <sup>i</sup> —O111—W6 | 140.6 (11) |
| W5—O3S—W2                                | 89.9 (6)   | W4—O112—W10               | 152.5 (11) |
| O11V—V11—O115 <sup>i</sup>               | 106.5 (6)  | W10—O113—W5               | 153.2 (10) |
| O11V—V11—O115                            | 106.5 (6)  | V11—O114—V12 <sup>i</sup> | 101.2 (8)  |
| O115 <sup>i</sup> —V11—O115              | 146.9 (11) | V11—O114—W7               | 124.2 (10) |
| O11V—V11—O114 <sup>i</sup>               | 108.3 (6)  | V12 <sup>i</sup> —O114—W7 | 131.6 (11) |
| O115 <sup>i</sup> —V11—O114 <sup>i</sup> | 92.3 (8)   | V11—O115—V12              | 102.7 (8)  |
| O115—V11—O114 <sup>i</sup>               | 77.3 (8)   | V11—O115—W8               | 124.9 (10) |
| O11V—V11—O114                            | 108.3 (6)  | V12—O115—W8               | 131.1 (10) |
| O115 <sup>i</sup> —V11—O114              | 77.3 (8)   | V12—O116—W9               | 142.6 (10) |
| O115—V11—O114                            | 92.3 (8)   | C13—N1—C11                | 110 (2)    |
| O114 <sup>i</sup> —V11—O114              | 143.4 (11) | C13—N1—C14                | 112 (2)    |
| O12V—V12—O116                            | 103.3 (9)  | C11—N1—C14                | 110 (3)    |
| O12V—V12—O111 <sup>i</sup>               | 104.1 (10) | C13—N1—C12                | 106 (3)    |
| O116—V12—O111 <sup>i</sup>               | 94.7 (9)   | C11—N1—C12                | 109 (3)    |
| O12V—V12—O114 <sup>i</sup>               | 106.1 (9)  | C14—N1—C12                | 110 (3)    |
| O116—V12—O114 <sup>i</sup>               | 149.2 (8)  | C24—N2—C21                | 116 (5)    |
| O111 <sup>i</sup> —V12—O114 <sup>i</sup> | 87.0 (8)   | C24—N2—C23                | 109 (4)    |
| O12V—V12—O115                            | 105.1 (10) | C21—N2—C23                | 113 (3)    |
| O116—V12—O115                            | 88.3 (7)   | C24—N2—C22                | 104 (4)    |
| O111 <sup>i</sup> —V12—O115              | 149.2 (9)  | C21—N2—C22                | 109 (5)    |
| O114 <sup>i</sup> —V12—O115              | 75.4 (8)   | C23—N2—C22                | 106 (4)    |
| W8—O11—W9                                | 155.9 (11) | C34—N3—C31                | 120 (5)    |
| W8—O12—W1                                | 122.5 (9)  | C34—N3—C32                | 106 (4)    |
| W5—O13—W6                                | 124.7 (10) | C31—N3—C32                | 111 (4)    |
| W6—O14—W2                                | 123.7 (11) | C34—N3—C33                | 110 (4)    |
| W7—O15—W1                                | 121.1 (10) | C31—N3—C33                | 101 (4)    |
|                                          |            | C32—N3—C33                | 109 (4)    |

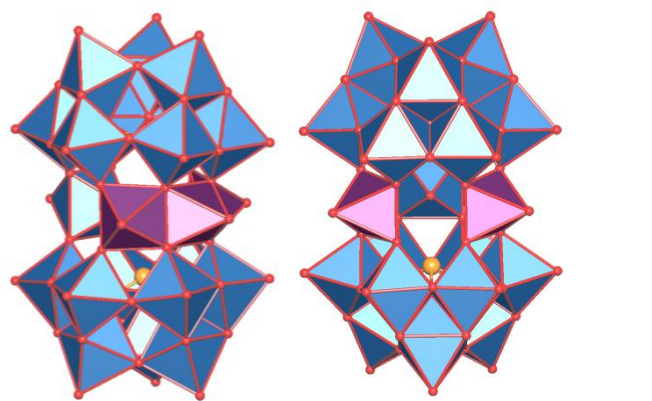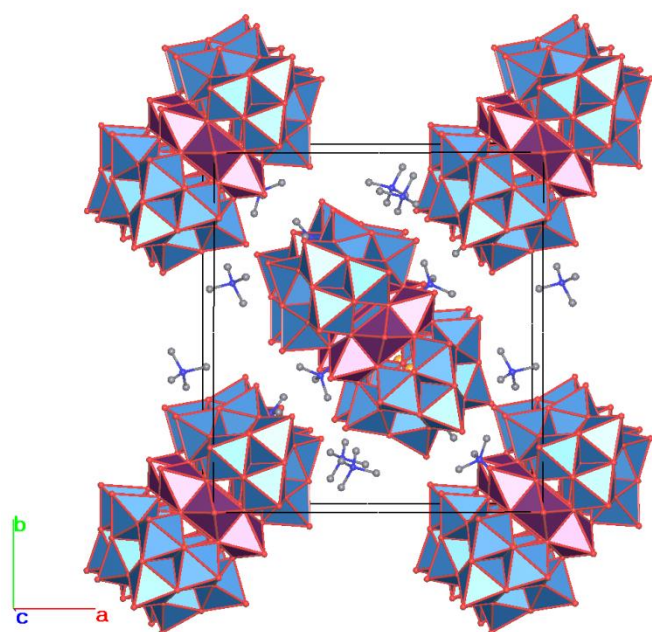

40% + 60% = co-crystal

**Fig. S4.** The anion  $[(\text{Se}(\text{W}_{4.57}/\text{V}_{4.43})\text{O}_{33})_2(\text{W}(\text{O})(\text{H}_2\text{O}))(\text{VO})_{2.6}]^{4.83-}$  (right) and crystal packing in  $(\text{NMe}_4)_{4.83}[(\text{Se}(\text{W}_{4.57}/\text{V}_{4.43})\text{O}_{33})_2(\text{W}(\text{O})(\text{H}_2\text{O}))(\text{VO})_{2.6}] \cdot 10.57\text{H}_2\text{O}$  (left) (**2**, polyhedral view).

**Table S4.** Structural types of isolated complexes compounds.

| Compound                                     | a, b, c (Å)                               | $\alpha, \beta, \gamma$ (°)         | Volume (Å <sup>3</sup> ) | Space group | POM type                                                                                                  |
|----------------------------------------------|-------------------------------------------|-------------------------------------|--------------------------|-------------|-----------------------------------------------------------------------------------------------------------|
| Me <sub>2</sub> NH <sub>2</sub> <sup>+</sup> | 8.595(1)<br>11.323(1)<br>16.133(2)        | 70.175(3)<br>87.075(3)<br>67.837(3) | 1362.6(5)                | P1          | [(W/V) <sub>6</sub> O <sub>19</sub> ] <sup>n-</sup> (disordered)                                          |
| Cs <sup>+</sup>                              | 20.1143(4)<br>20.1143(4)<br>32.8320(15)   | 90.00<br>90.00<br>120.00            | 11503.7(6)               | R3          | [(Se(W/V) <sub>9</sub> O <sub>33</sub> ) <sub>2</sub> (VO) <sub>x</sub> (WO) <sub>y</sub> ] <sup>n-</sup> |
| Me <sub>2</sub> NH <sub>2</sub> <sup>+</sup> | 34.382(2)<br>12.9291(9)<br>25.2008(17)    | 90<br>110.234(2)<br>90              | 10511.3(12)              | C2/c        | [(Se(W/V) <sub>9</sub> O <sub>33</sub> ) <sub>2</sub> (VO) <sub>x</sub> (WO) <sub>y</sub> ] <sup>n-</sup> |
| Me <sub>2</sub> NH <sub>2</sub> <sup>+</sup> | 41.0493(10)<br>41.0493(10)<br>36.4499(18) | 90.00<br>90.00<br>120.00            | 53191(3)                 | R3          | [(Se(W/V) <sub>9</sub> O <sub>33</sub> ) <sub>2</sub> (VO) <sub>x</sub> (WO) <sub>y</sub> ] <sup>n-</sup> |
| Me <sub>2</sub> NH <sub>2</sub> <sup>+</sup> | 27.85(1)<br>27.86(1)<br>27.87(1)          | 107.53(1)<br>119.802(8)<br>99.52(1) | 16545.3(4)               | P1          | [(Se(W/V) <sub>9</sub> O <sub>33</sub> ) <sub>2</sub> (VO) <sub>x</sub> (WO) <sub>y</sub> ] <sup>n-</sup> |

## 2. SI-MS.

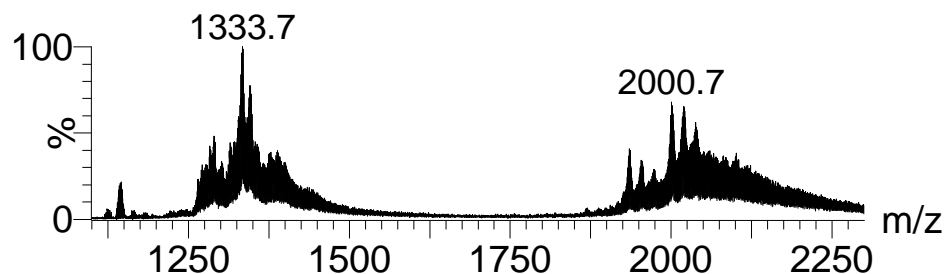

**Fig. S5.** ESI mass spectrum of  $10^{-4}$  M water solutions of sample **2** with 0.1 % of formic acid

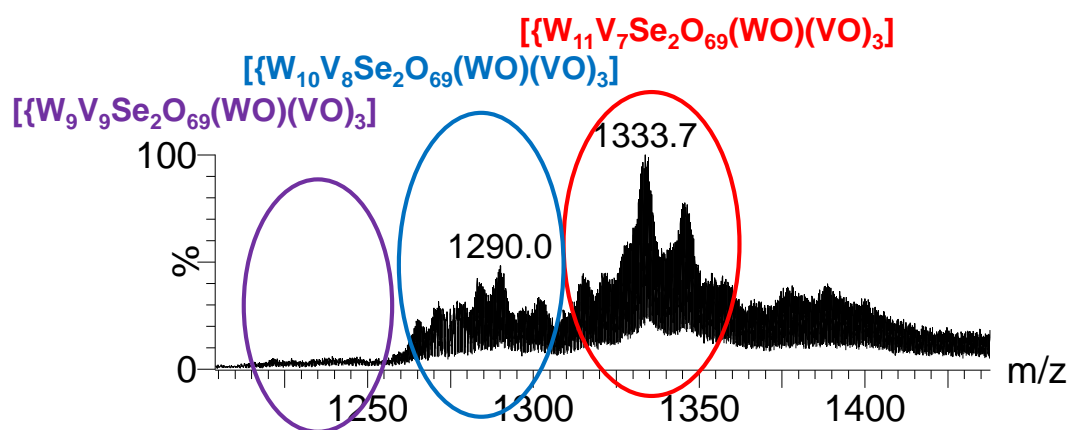

**Fig. S6.** Expanded regions of the ESI mass spectrum of  $10^{-4}$  M water solutions of sample **2** with 0.1 % of formic acid in the m/z 1150 to 1500 range where triply-charged anions are seen. Additional peaks featuring the central  $\{WO(VO)_2\}$  belt were also observed for example at m/z 1338  $\{[(Se_2W_{11}V_7O_{66})\{WO(VO)_2\} + 13H + 2K]^{3-}\}$  or 1293  $\{[(Se_2W_{10}V_8O_{66})\{WO(VO)_2\} + 12H + 2K]^{3-}\}$  but were overlapped with the dominant peaks due to POMs with the central  $\{WO(VO)_3\}$  belt.

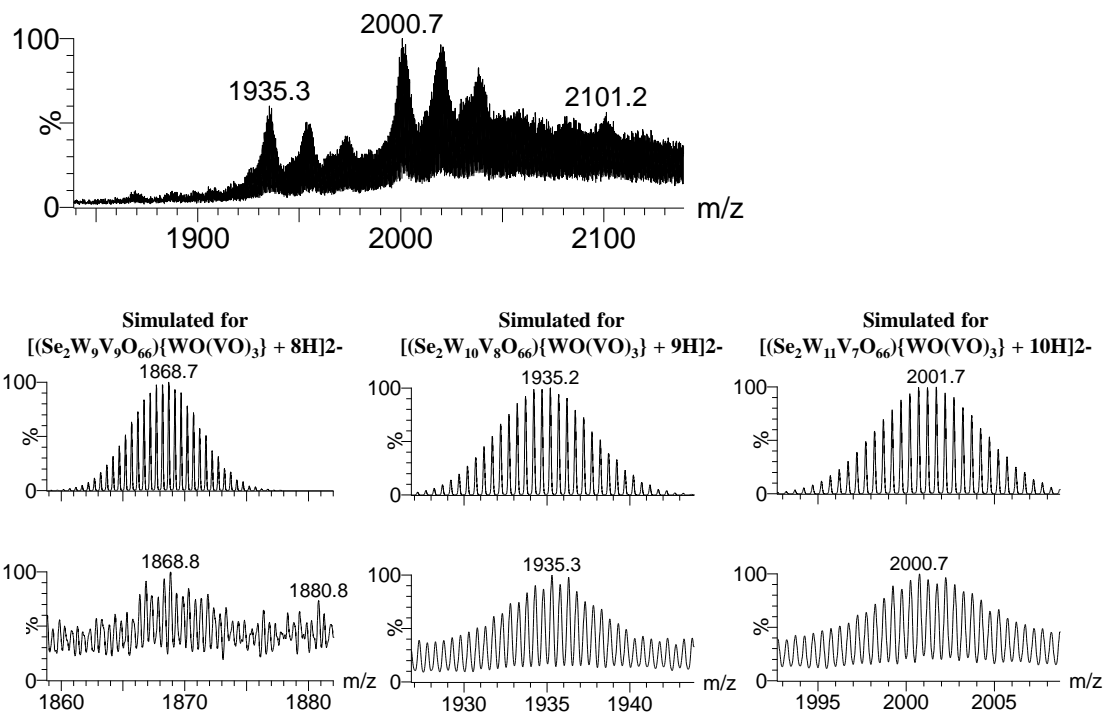

**Fig. S7.** Expanded region of the ESI mass spectrum of  $10^{-4}$  M water solutions of sample **2** with 0.1 % of formic acid in the m/z 1850 to 2150 range (top) and simulated and experimental isotopic pattern for the indicated H<sup>+</sup> adducts.

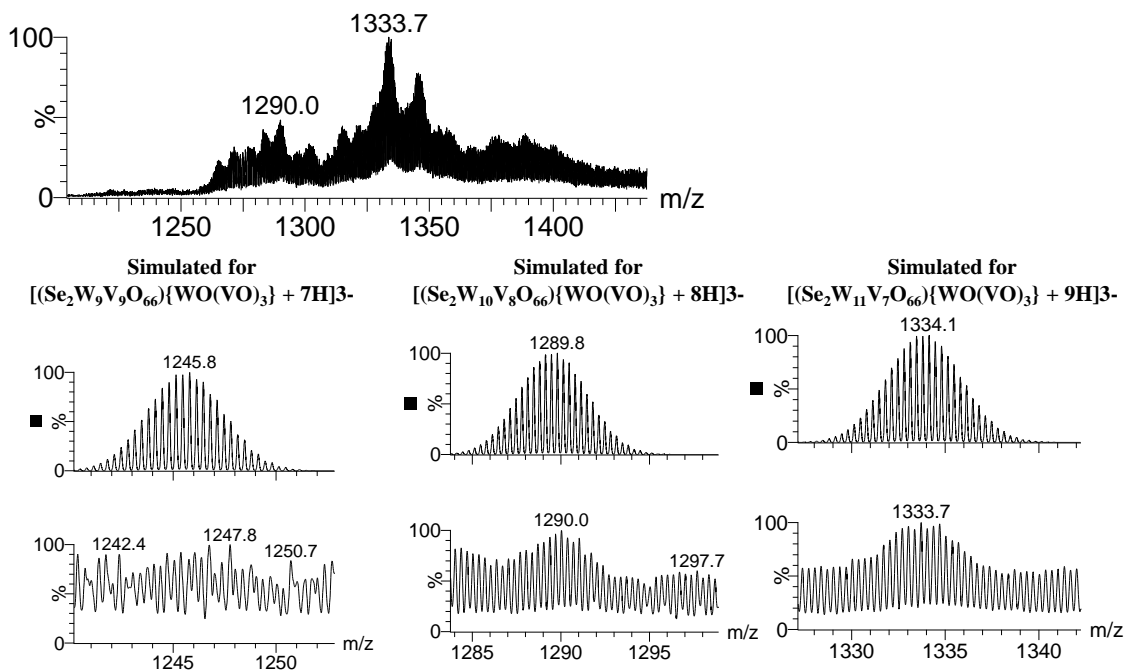

**Fig. S8.** Expanded region of the ESI mass spectrum of  $10^{-4}$  M water solutions of sample **2** with 0.1 % of formic acid in m/z 1150 to 1500 range (top) and simulated and experimental isotopic pattern for the indicated H<sup>+</sup> adducts.

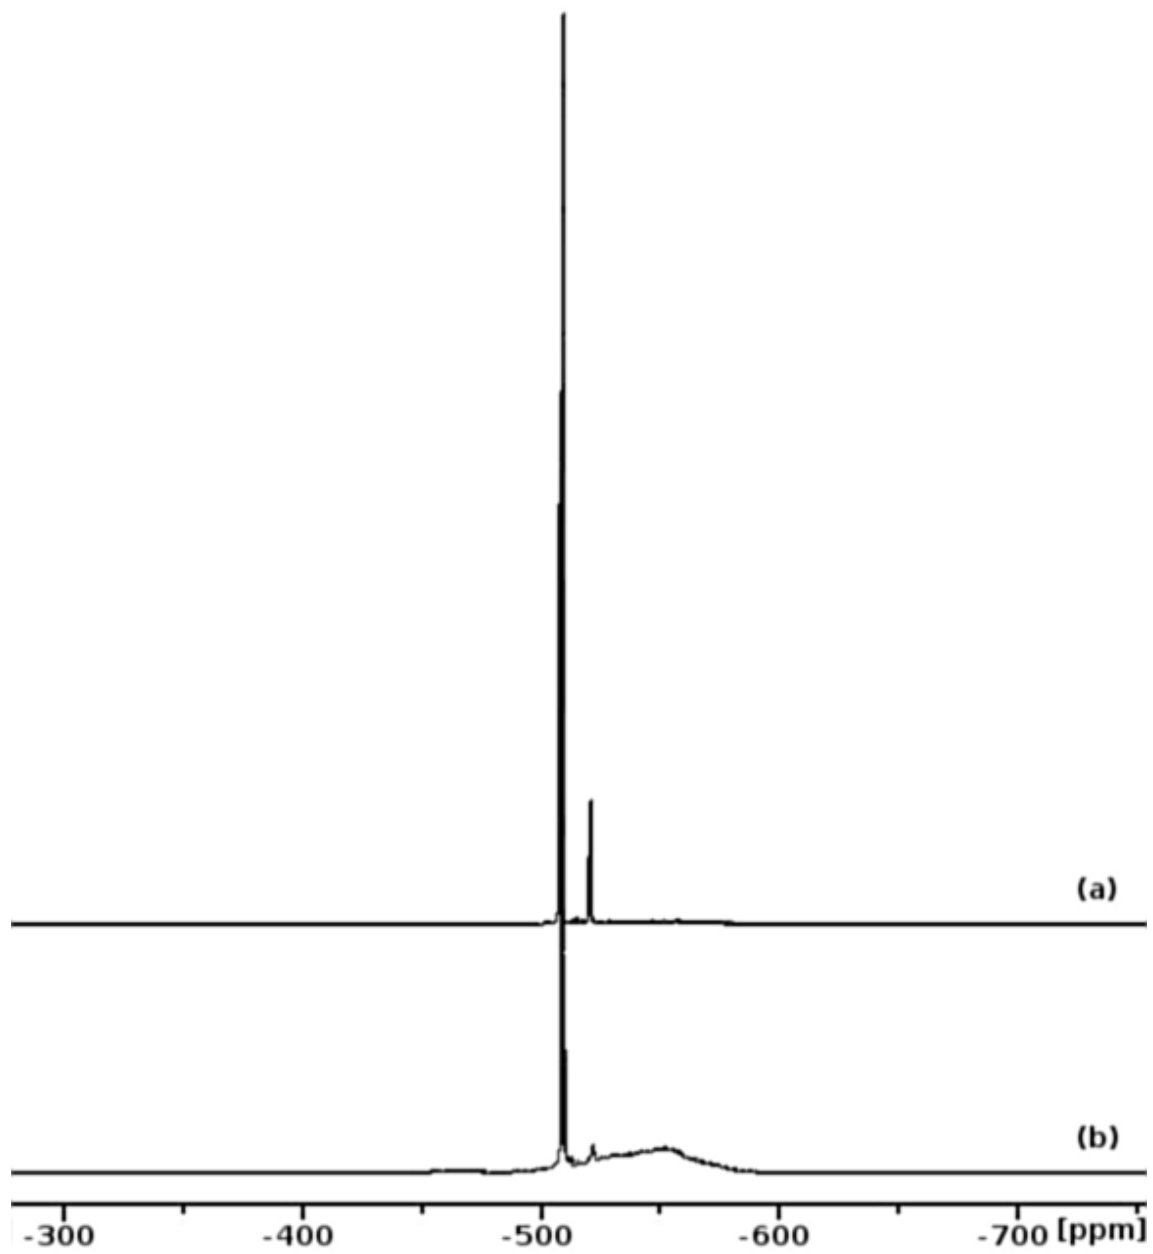

**Fig. S9.**  $^{51}\text{V}$  NMR spectra of initial mixture.

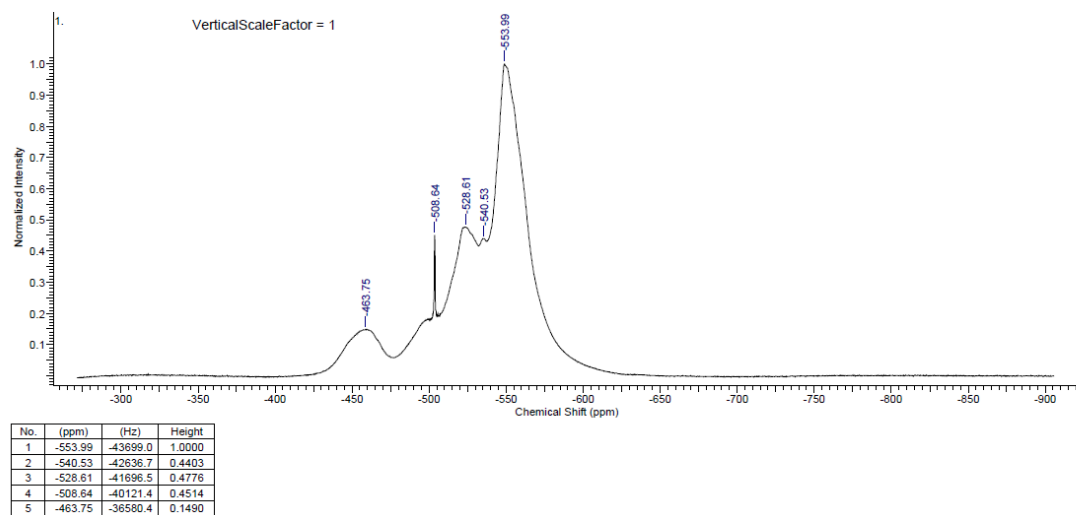

Fig. S10.  $^{51}\text{V}$  NMR spectra of enriched product.

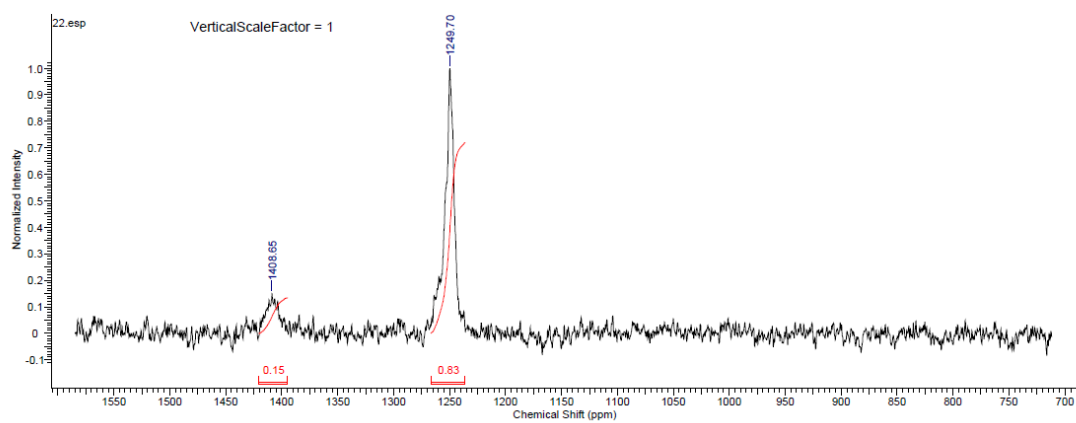

Fig. S11.  $^{77}\text{Se}$  NMR spectra of enriched product.
